# Supplementary material for: A folded ice monolayer
Source: Royal Society of Chemistry journal article supplement (doi:10.1039/d0cp03112g), 2020-01-01
Supplement: d0cp03112g1.pdf [file d0cp03112g1.pdf]

## Supplementary Information

### A folded ice monolayer

Ying Xu, Xiaoyu Xuan, Zhuhua Zhang\* and Wanlin Guo\*

State Key Laboratory of Mechanics and Control of Mechanical Structures and Institute of Nanoscience, Key Laboratory for Intelligent Nano Materials and Devices of Ministry of Education, Nanjing University of Aeronautics and Astronautics, Nanjing, China.

\*Correspondence to: [chuwazhang@nuaa.edu.cn](mailto:chuwazhang@nuaa.edu.cn), [wlguo@nuaa.edu.cn](mailto:wlguo@nuaa.edu.cn)

This file includes the details of calculating the  $N$  (Table S1); the structures of the  $C_b$ ,  $C_T$ ,  $C_c$  and  $C_{bh}$  ice models (Fig. S1-2); the thermal stability analysis of the  $C_f$  ice model (Fig. S3-4); Energies due to the oscillation entropy for several typical ice models (Table S2); Free energy of the  $C_f$ ,  $C_T$ ,  $C_{sp}$  and  $C_b$  at  $\rho = 0.1 \text{ \AA}^{-2}$  at different temperatures (Fig. S5);  $E_f$  as a function of water density for the  $C_p$ ,  $C_{dw}$ ,  $C_{ps1}$ ,  $C_{ps2}$  and  $C_{psh}$  (Fig. S6) and the crystallographic information of the six new ice models.

**Table S1.** Detailed  $|S_i\rangle$ ,  $N_{S_i}$  and  $P(|S_i\rangle)$  for the six ice models. a and b are used to describe the oxygen atoms in the top and bottom planes. The a\* and b\* in the following table are of mirror-symmetry with the a and b, respectively.

|           | $ S_i\rangle$ | $N_{S_i}$ | $P( S_i\rangle)$ | $N$  |
|-----------|---------------|-----------|------------------|------|
| $C_f$     | a             | 0         | 0.25             | 0    |
|           | a*            | 0         | 0.25             |      |
|           | b             | 0         | 0.25             |      |
|           | b*            | 0         | 0.25             |      |
| $C_{dw}$  | aa            | 1         | 0.5              | 1    |
|           | bb            | 1         | 0.5              |      |
| $C_p$     | aa            | 2         | 0.5              | 2    |
|           | bb            | 2         | 0.5              |      |
| $C_{ps1}$ | aaaa          | 2         | 0.5              | 2    |
|           | bbbb          | 2         | 0.5              |      |
| $C_{ps2}$ | aaaa          | 2         | 0.5              | 2    |
|           | bbbb          | 2         | 0.5              |      |
| $C_{psh}$ | aa            | 1         | 0.125            | 0.25 |
|           | bb            | 1         | 0.125            |      |
|           | a             | 0         | 0.125            |      |
|           | b             | 0         | 0.125            |      |

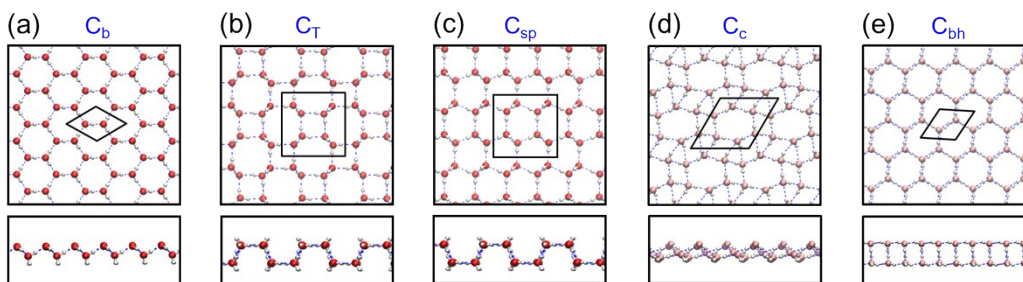

Fig. S1 Front and side views of the (a) buckled honeycomb ( $C_b$ ), (b) truncated-square ( $C_T$ ), (c) secondary prism, (c) corrugated ( $C_c$ ) and (e) bilayer hexagonal ( $C_{bh}$ ) ice models.

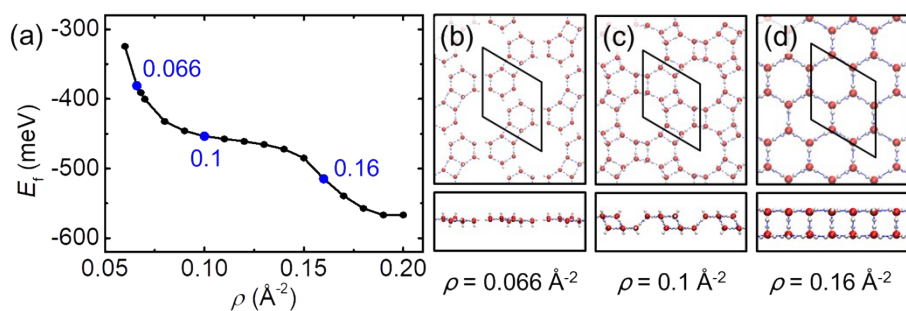

Fig. S2 (a) Formation energy ( $E_f$ ) as a function of water density for the  $C_f$ . (b-d) Detailed structures of  $C_f$  with water densities of 0.066, 0.1 and 0.16  $\text{\AA}^{-2}$ , respectively.

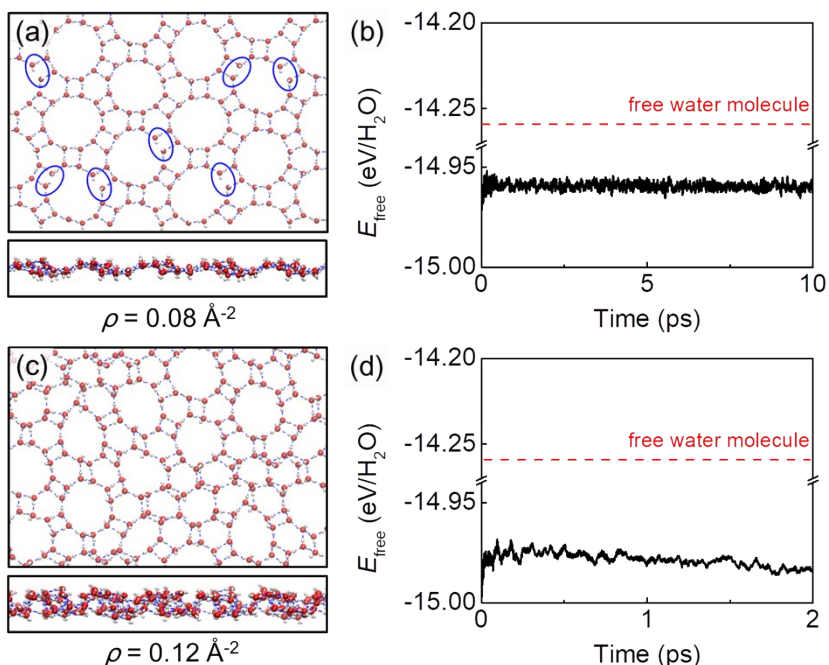

Fig. S3 (a) Front and side views of snapshots of the  $C_f$  at the end of 10 ps AIMD simulation at 78 K at the water density of 0.08  $\text{\AA}^{-2}$  and (b) its evolution of total energy throughout the AIMD simulation. (c) Front and side views of snapshots of the  $C_f$  at the end of 2 ps AIMD simulations at 78 K at the water density of 0.12  $\text{\AA}^{-2}$  and (d) its evolution of total free energy throughout the AIMD simulation.

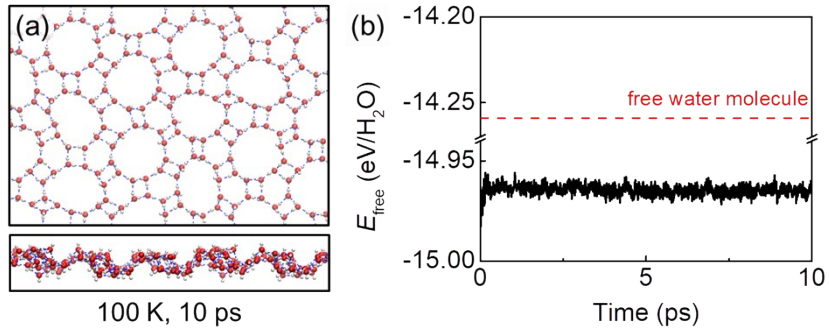

Fig. S4 (a) Front and side views of a snapshot of the  $C_f$  at the end of 10 ps AIMD simulation at 100 K. (b) The evolution of total free energy throughout the AIMD simulations.

**Table S2.** Free energies at 0 K ( $E_{\text{free}}$ ) and energies due to the oscillation entropy for several typical ice models at a given water density  $\rho = 0.1 \text{ \AA}^{-2}$ . The water densities for  $C_{\text{bh}}$ ,  $C_{\text{dw}}$ ,  $C_{\text{p}}$  and  $C_{\text{ps2}}$  are chosen by the  $E_f$  at which these ice models have the lowest  $E_f$ .

|                  | density ( $\text{\AA}^{-2}$ ) | $E_{\text{free}}$ (eV) |       | TS (eV) |       |
|------------------|-------------------------------|------------------------|-------|---------|-------|
|                  |                               | 0 K                    | 78 K  | 78 K    | 100 K |
| $C_f$            | 0.1                           | -180.794               | 0.117 | 0.117   | 0.199 |
| $C_T$            | 0.1                           | -120.493               | 0.061 | 0.061   | 0.108 |
| $C_{\text{sp}}$  | 0.1                           | -120.447               | 0.066 | 0.066   | 0.116 |
| $C_b$            | 0.1                           | -30.091                | 0.004 | 0.004   | 0.009 |
| $C_{\text{bh}}$  | 0.185                         | -60.711                | 0.020 | 0.020   | 0.036 |
| $C_{\text{dw}}$  | 0.11                          | -120.517               | 0.061 | 0.061   | 0.106 |
| $C_p$            | 0.19                          | -60.430                | 0.023 | 0.023   | 0.042 |
| $C_{\text{ps2}}$ | 0.18                          | -120.718               | 0.073 | 0.073   | 0.123 |
| $C_{\text{psh}}$ | 0.18                          | -150.782               | 0.087 | 0.087   | 0.150 |

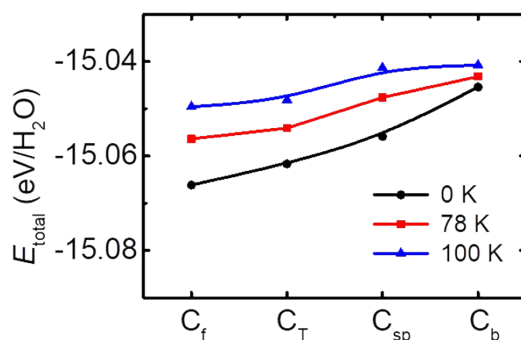

Fig. S5 Free energy of the  $C_f$ ,  $C_T$ ,  $C_{sp}$  and  $C_b$  at  $\rho = 0.1 \text{ \AA}^{-2}$  at different temperatures, including the contribution from the oscillation entropy.

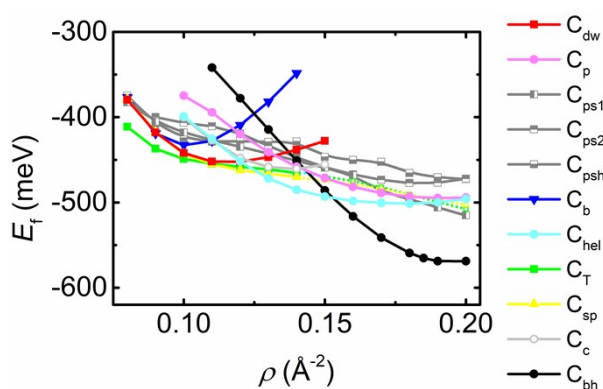

Fig. S6 Formation energy ( $E_f$ ) as a function of water density for the  $C_{dw}$  (red solid squares),  $C_p$  (light magenta solid circles),  $C_{ps1}$  (grey half left squares),  $C_{ps2}$  (grey half up squares),  $C_{psh}$  (grey half down squares),  $C_b$  (blue solid down triangles),  $C_{hel}$  (cyan solid circles),  $C_T$  (green solid squares),  $C_{sp}$  (yellow solid up triangles),  $C_c$  (light grey open circles) and  $C_{bh}$  (black solid circles) models. The  $C_T$  and  $C_{sp}$  become thick double-layer ices in the region of  $\rho > 0.14 \text{ \AA}^{-2}$ , as shown by the dotted line parts.

### Crystallographic Information of the C<sub>f</sub>

|                  |        |       |        |
|------------------|--------|-------|--------|
| cell_length_a    | 11.772 |       |        |
| cell_length_b    | 11.772 |       |        |
| cell_length_c    | 33.000 |       |        |
| cell_angle_alpha | 90.000 |       |        |
| cell_angle_beta  | 90.000 |       |        |
| cell_angle_gamma | 60.000 |       |        |
| O1               | 8.637  | 3.398 | 13.945 |
| O2               | 7.178  | 5.887 | 13.816 |
| O3               | 4.473  | 5.762 | 13.942 |
| O4               | 3.032  | 3.259 | 13.828 |
| O5               | 7.389  | 0.996 | 13.811 |
| O6               | 4.500  | 0.983 | 13.938 |
| O7               | 13.109 | 9.194 | 15.899 |
| O8               | 14.589 | 6.924 | 16.000 |
| O9               | 8.988  | 6.748 | 15.905 |
| O10              | 10.460 | 4.265 | 16.010 |
| O11              | 13.165 | 4.408 | 15.914 |
| O12              | 10.219 | 9.161 | 15.997 |
| H1               | 9.768  | 8.272 | 15.910 |
| H2               | 8.310  | 6.538 | 15.225 |
| H3               | 9.548  | 5.944 | 15.978 |
| H4               | 11.456 | 4.321 | 15.921 |
| H5               | 13.684 | 3.922 | 15.235 |
| H6               | 13.584 | 5.295 | 15.981 |
| H7               | 14.043 | 7.758 | 15.910 |
| H8               | 12.132 | 9.111 | 15.970 |
| H9               | 13.267 | 9.884 | 15.218 |
| H10              | 6.183  | 5.839 | 13.915 |
| H11              | 4.045  | 4.880 | 13.866 |
| H12              | 3.572  | 2.422 | 13.922 |
| H13              | 5.477  | 1.057 | 13.858 |
| H14              | 7.848  | 1.879 | 13.914 |
| H15              | 8.084  | 4.207 | 13.866 |
| H16              | 10.301 | 3.791 | 16.843 |
| H17              | 9.889  | 9.538 | 16.829 |
| H18              | 15.082 | 7.025 | 16.831 |
| H19              | 4.341  | 0.280 | 14.607 |
| H20              | 3.950  | 6.255 | 14.611 |
| H21              | 7.720  | 0.626 | 12.976 |
| H22              | 9.321  | 3.608 | 14.618 |
| H23              | 7.334  | 6.361 | 12.983 |
| H24              | 2.537  | 3.157 | 12.998 |

### Crystallographic Information of the C<sub>p</sub>

|                  |        |       |        |
|------------------|--------|-------|--------|
| cell_length_a    | 5.432  |       |        |
| cell_length_b    | 5.799  |       |        |
| cell_length_c    | 33.000 |       |        |
| cell_angle_alpha | 90.000 |       |        |
| cell_angle_beta  | 90.000 |       |        |
| cell_angle_gamma | 90.000 |       |        |
| O1               | 0.275  | 5.525 | 13.546 |
| O2               | 0.258  | 1.277 | 15.797 |
| O3               | 2.989  | 4.172 | 13.702 |
| O4               | 2.973  | 2.628 | 15.957 |
| H1               | 0.270  | 0.314 | 14.354 |
| H2               | 0.276  | 0.339 | 12.791 |
| H3               | 4.890  | 1.836 | 15.900 |
| H4               | 1.055  | 1.840 | 15.901 |
| H5               | 2.192  | 4.735 | 13.599 |
| H6               | 3.788  | 4.732 | 13.599 |
| H7               | 2.978  | 3.213 | 15.147 |
| H8               | 2.972  | 3.244 | 16.709 |

### Crystallographic Information of the C<sub>dh</sub>

|                  |        |       |        |
|------------------|--------|-------|--------|
| cell_length_a    | 7.936  |       |        |
| cell_length_b    | 7.936  |       |        |
| cell_length_c    | 33.000 |       |        |
| cell_angle_alpha | 90.000 |       |        |
| cell_angle_beta  | 90.000 |       |        |
| cell_angle_gamma | 90.000 |       |        |
| O1               | 1.100  | 5.354 | 17.017 |
| O2               | 5.084  | 5.377 | 18.577 |
| O3               | 3.275  | 6.888 | 17.021 |
| O4               | 7.245  | 6.930 | 18.528 |
| O5               | 0.965  | 2.871 | 18.464 |
| O6               | 3.362  | 1.366 | 18.527 |
| O7               | 4.978  | 2.924 | 17.073 |
| O8               | 7.327  | 1.349 | 16.921 |
| H1               | 0.446  | 5.892 | 17.521 |
| H2               | 1.131  | 4.486 | 17.480 |
| H3               | 4.422  | 5.900 | 18.068 |
| H4               | 5.133  | 4.511 | 18.112 |
| H5               | 2.458  | 6.299 | 16.978 |
| H6               | 3.535  | 7.069 | 16.103 |
| H7               | 6.432  | 6.339 | 18.595 |
| H8               | 7.511  | 7.142 | 19.438 |
| H9               | 0.346  | 2.309 | 17.900 |
| H10              | 0.492  | 3.048 | 19.294 |
| H11              | 2.492  | 1.825 | 18.592 |
| H12              | 3.207  | 0.515 | 18.060 |
| H13              | 4.523  | 3.148 | 16.244 |
| H14              | 4.337  | 2.348 | 17.598 |
| H15              | 6.467  | 1.828 | 16.880 |
| H16              | 7.166  | 0.510 | 17.408 |



### Crystallographic Information of the C<sub>ps1</sub>

|                  |        |       |        |
|------------------|--------|-------|--------|
| cell_length_a    | 7.322  |       |        |
| cell_length_b    | 8.603  |       |        |
| cell_length_c    | 33.000 |       |        |
| cell_angle_alpha | 90.000 |       |        |
| cell_angle_beta  | 90.000 |       |        |
| cell_angle_gamma | 90.000 |       |        |
| O1               | 7.089  | 7.414 | 18.654 |
| O2               | 0.059  | 3.263 | 16.375 |
| O3               | 6.347  | 4.676 | 18.671 |
| O4               | 4.137  | 8.018 | 18.625 |
| O5               | 0.504  | 0.477 | 16.380 |
| O6               | 3.455  | 1.097 | 16.353 |
| O7               | 2.686  | 3.825 | 16.268 |
| O8               | 3.721  | 5.230 | 18.553 |
| H1               | 0.453  | 7.578 | 19.321 |
| H2               | 6.947  | 6.433 | 18.647 |
| H3               | 6.963  | 3.653 | 17.174 |
| H4               | 0.055  | 2.280 | 16.476 |
| H5               | 6.535  | 4.218 | 19.507 |
| H6               | 5.347  | 4.814 | 18.644 |
| H7               | 3.929  | 0.063 | 17.917 |
| H8               | 5.112  | 8.022 | 18.721 |
| H9               | 0.285  | 8.443 | 17.095 |
| H10              | 1.479  | 0.469 | 16.293 |
| H11              | 3.304  | 2.075 | 16.339 |
| H12              | 4.160  | 0.928 | 15.705 |
| H13              | 2.880  | 4.266 | 15.424 |
| H14              | 1.687  | 3.684 | 16.288 |
| H15              | 3.703  | 6.215 | 18.475 |
| H16              | 3.299  | 4.850 | 17.751 |

### Crystallographic Information of the C<sub>ps2</sub>

|                  |        |       |        |
|------------------|--------|-------|--------|
| cell_length_a    | 8.662  |       |        |
| cell_length_b    | 7.272  |       |        |
| cell_length_c    | 33.000 |       |        |
| cell_angle_alpha | 90.000 |       |        |
| cell_angle_beta  | 90.000 |       |        |
| cell_angle_gamma | 90.000 |       |        |
| O1               | 7.223  | 3.496 | 18.357 |
| O2               | 1.908  | 6.977 | 16.661 |
| O3               | 8.584  | 0.960 | 18.634 |
| O4               | 4.814  | 1.873 | 18.845 |
| O5               | 0.488  | 4.553 | 16.367 |
| O6               | 2.911  | 2.946 | 16.841 |
| O7               | 4.262  | 5.488 | 16.579 |
| O8               | 6.239  | 6.721 | 18.555 |
| H1               | 7.281  | 4.137 | 19.089 |
| H2               | 7.790  | 2.721 | 18.590 |
| H3               | 1.442  | 0.254 | 17.325 |
| H4               | 1.304  | 6.205 | 16.514 |
| H5               | 0.290  | 0.742 | 19.508 |
| H6               | 7.812  | 0.341 | 18.513 |
| H7               | 4.070  | 2.133 | 18.262 |
| H8               | 5.522  | 2.525 | 18.652 |
| H9               | 8.404  | 4.290 | 16.946 |
| H10              | 1.197  | 3.902 | 16.559 |
| H11              | 3.475  | 3.728 | 16.620 |
| H12              | 2.978  | 2.316 | 16.101 |
| H13              | 4.629  | 5.708 | 15.706 |
| H14              | 3.485  | 6.100 | 16.699 |
| H15              | 5.634  | 0.219 | 18.707 |
| H16              | 5.773  | 6.178 | 17.887 |

Crystallographic Information of the C<sub>psh</sub>

|                  |        |        |        |
|------------------|--------|--------|--------|
| cell_length_a    | 7.700  |        |        |
| cell_length_b    | 11.400 |        |        |
| cell_length_c    | 33.000 |        |        |
| cell_angle_alpha | 90.000 |        |        |
| cell_angle_beta  | 90.000 |        |        |
| cell_angle_gamma | 90.000 |        |        |
| O1               | 5.230  | 10.441 | 13.952 |
| O2               | 3.351  | 10.026 | 15.919 |
| O3               | 6.901  | 8.060  | 13.605 |
| O4               | 1.329  | 8.115  | 15.578 |
| O5               | 2.835  | 5.946  | 14.451 |
| O6               | 3.045  | 3.181  | 15.455 |
| O7               | 5.637  | 3.480  | 14.449 |
| O8               | 5.567  | 6.072  | 15.066 |
| O9               | 6.579  | 0.902  | 15.333 |
| O10              | 1.619  | 0.751  | 14.908 |
| H1               | 2.047  | 8.768  | 15.766 |
| H2               | 5.759  | 11.189 | 14.375 |
| H3               | 4.866  | 10.785 | 13.120 |
| H4               | 4.022  | 10.100 | 15.184 |
| H5               | 3.858  | 10.108 | 16.743 |
| H6               | 0.804  | 8.029  | 16.390 |
| H7               | 6.380  | 8.889  | 13.665 |
| H8               | 0.019  | 8.224  | 14.116 |
| H9               | 2.591  | 5.054  | 14.767 |
| H10              | 3.158  | 3.275  | 16.416 |
| H11              | 3.963  | 3.220  | 15.077 |
| H12              | 5.749  | 4.462  | 14.671 |
| H13              | 5.720  | 3.429  | 13.482 |
| H14              | 6.041  | 6.748  | 14.518 |
| H15              | 4.604  | 6.186  | 14.868 |
| H16              | 2.201  | 6.580  | 14.848 |
| H17              | 2.101  | 1.593  | 15.059 |
| H18              | 2.161  | 0.058  | 15.340 |
| H19              | 6.349  | 1.836  | 15.141 |
| H20              | 7.563  | 0.837  | 15.221 |
